# Supplementary material for: Combined ionic liquid and supercritical carbon dioxide based dynamic extraction of six cannabinoids from Cannabis sativa L.
Source: Royal Society of Chemistry journal article supplement (doi:10.1039/d1gc03516a), 2021-01-01

## Supporting information

### **Ionic liquid based dynamic supercritical carbon dioxide extraction of six different cannabinoids from *Cannabis sativa* L.**

Christoph Kornpointner<sup>†a</sup>, Aitor Sainz Martinez<sup>†b</sup>, Michael Schnürch<sup>b</sup>, Heidi Halbwirth<sup>\*a</sup> and Katharina Bica-Schröder<sup>\*b</sup>

- a. Institute of Chemical, Environmental and Bioscience Engineering, Technische Universität Wien, Getreidemarkt 9/166, 1060, Vienna, Austria. Institute of Chemical, Environmental and Bioscience Engineering, Technische Universität Wien, Getreidemarkt 9/166, 1060 Vienna, Austria*
- b. Institute of Applied Synthetic Chemistry, Technische Universität Wien, Getreidemarkt 9/163, 1060, Vienna, Austria.*

† These two authors contributed equally to this work.

\* correspondence: [katharina.schroeder@tuwien.ac.at](mailto:katharina.schroeder@tuwien.ac.at), [heidrun.halbwirth@tuwien.ac.at](mailto:heidrun.halbwirth@tuwien.ac.at)

Number of pages: 7

Number of figures: 7

Number of tables: 4

**Table S1** Extraction parameters for IL-SFE.

| Exp. | IL                        | t <sub>Pre</sub> /<br>min | T <sub>Pre</sub> /<br>°C | m <sub>IL</sub> /<br>g | m <sub>H<sub>2</sub>O</sub> /<br>g | P <sub>SFE</sub> /<br>MPa | T <sub>SFE</sub> /<br>°C |
|------|---------------------------|---------------------------|--------------------------|------------------------|------------------------------------|---------------------------|--------------------------|
| 1    | [C <sub>2</sub> mim][OAc] | 60                        | 25                       | 3                      | 6                                  | 20                        | 70                       |
| 2    | [C <sub>2</sub> mim][OAc] | 60                        | 70                       | 3                      | 6                                  | 20                        | 70                       |
| 3    | [C <sub>2</sub> mim][OAc] | 15                        | 25                       | 3                      | 6                                  | 20                        | 70                       |
| 4    | [C <sub>2</sub> mim][OAc] | 15                        | 70                       | 3                      | 6                                  | 20                        | 70                       |
| 5    | [C <sub>2</sub> mim][OAc] | 15                        | 70                       | 3                      | 3                                  | 20                        | 70                       |
| 6    | [C <sub>2</sub> mim][OAc] | 15                        | 70                       | 3                      | 9                                  | 20                        | 70                       |
| 7    | [C <sub>2</sub> mim][OAc] | 15                        | 70                       | 3                      | -                                  | 20                        | 70                       |
| 8    | [C <sub>2</sub> mim][OAc] | 15                        | 70                       | -                      | 9                                  | 20                        | 70                       |
| 9    | -                         | -                         | -                        | -                      | -                                  | 20                        | 70                       |
| 10   | [C <sub>2</sub> mim][OAc] | 15                        | 70                       | 3                      | 9                                  | 10                        | 70                       |
| 11   | [C <sub>2</sub> mim][OAc] | 15                        | 70                       | 3                      | 9                                  | 15                        | 70                       |
| 12   | [C <sub>2</sub> mim][OAc] | 15                        | 70                       | 3                      | 9                                  | 30                        | 70                       |
| 13   | [C <sub>2</sub> mim][OAc] | 15                        | 70                       | 3                      | 9                                  | 20                        | 35                       |
| 14   | [C <sub>2</sub> mim][OAc] | 15                        | 70                       | 3                      | 9                                  | 10                        | 35                       |
| 15   | [Ch][OAc]                 | 15                        | 70                       | 3                      | 9                                  | 20                        | 70                       |
| 16   | [C <sub>2</sub> mim][DMP] | 15                        | 70                       | 3                      | 9                                  | 20                        | 70                       |

Pre: IL pre-treatment before SFE

Exp. Number corresponds to the main article

**Table S2.** Extracted cannabinoids by IL-SFE and conventional extraction, (n = 3 ± SD).

| Exp.                                   | Yield CBD /<br>(mg/g)      | Yield CBDA /<br>(mg/g)       | Yield Δ <sup>9</sup> -THC /<br>(mg/g) | Yield THCA /<br>(mg/g)        | Yield CBG /<br>(mg/g)        | Yield CBGA /<br>(mg/g)       |
|----------------------------------------|----------------------------|------------------------------|---------------------------------------|-------------------------------|------------------------------|------------------------------|
| <b>IL-SFE</b>                          |                            |                              |                                       |                               |                              |                              |
| 1                                      | 4.29 ± 0.24 <sup>f</sup>   | 8.8 ± 1.0 <sup>cd</sup>      | 0.159 ± 0.004 <sup>de</sup>           | 0.306 ± 0.008 <sup>def</sup>  | 0.137 ± 0.007 <sup>d</sup>   | 0.092 ± 0.019 <sup>fg</sup>  |
| 2                                      | 6.58 ± 0.24 <sup>c</sup>   | 6.3 ± 0.6 <sup>fg</sup>      | 0.164 ± 0.008 <sup>cde</sup>          | 0.307 ± 0.013 <sup>cdef</sup> | 0.186 ± 0.003 <sup>c</sup>   | 0.058 ± 0.017 <sup>g</sup>   |
| 3                                      | 5.0 ± 0.3 <sup>de</sup>    | 7.9 ± 0.6 <sup>de</sup>      | 0.169 ± 0.008 <sup>cd</sup>           | 0.308 ± 0.023 <sup>cdef</sup> | 0.154 ± 0.008 <sup>d</sup>   | 0.067 ± 0.012 <sup>fg</sup>  |
| 4                                      | 5.29 ± 0.27 <sup>d</sup>   | 8.3 ± 0.4 <sup>cde</sup>     | 0.174 ± 0.004 <sup>cd</sup>           | 0.339 ± 0.013 <sup>abcd</sup> | 0.164 ± 0.007 <sup>cd</sup>  | 0.082 ± 0.012 <sup>fg</sup>  |
| 5                                      | 7.45 ± 0.05 <sup>b</sup>   | 1.09 ± 0.17 <sup>h</sup>     | 0.1807 ± 0.0007 <sup>c</sup>          | 0.150 ± 0.014 <sup>i</sup>    | 0.226 ± 0.007 <sup>b</sup>   | n.d.                         |
| 6                                      | 4.6 ± 0.3e <sup>f</sup>    | 10.9 ± 0.4 <sup>ab</sup>     | 0.177 ± 0.007 <sup>cd</sup>           | 0.365 ± 0.011 <sup>ab</sup>   | 0.157 ± 0.016 <sup>cd</sup>  | 0.178 ± 0.003 <sup>cd</sup>  |
| 7                                      | 0.150 ± 0.021 <sup>i</sup> | 0.1727 ± 0.0025 <sup>h</sup> | 0.023 ± 0.007 <sup>i</sup>            | 0.0099 ± 0.0020 <sup>k</sup>  | n.d.                         | n.d.                         |
| 8                                      | 2.24 ± 0.12 <sup>h</sup>   | 9.8 ± 0.5 <sup>bc</sup>      | 0.114 ± 0.003 <sup>g</sup>            | 0.260 ± 0.019 <sup>g</sup>    | 0.0641 ± 0.0015 <sup>f</sup> | 0.196 ± 0.007 <sup>bc</sup>  |
| 9                                      | 3.01 ± 0.04 <sup>g</sup>   | 7.1 ± 0.5 <sup>ef</sup>      | 0.165 ± 0.003 <sup>cde</sup>          | 0.190 ± 0.012 <sup>h</sup>    | 0.101 ± 0.012 <sup>e</sup>   | 0.095 ± 0.007 <sup>fg</sup>  |
| 10                                     | 3.388 ± 0.012 <sup>g</sup> | 0.27 ± 0.06 <sup>h</sup>     | 0.0793 ± 0.0010 <sup>h</sup>          | 0.0092 ± 0.0019 <sup>k</sup>  | 0.045 ± 0.008 <sup>fg</sup>  | n.d.                         |
| 11                                     | 4.44 ± 0.03 <sup>ef</sup>  | 8.56 ± 0.18 <sup>cde</sup>   | 0.1596 ± 0.0015 <sup>de</sup>         | 0.297 ± 0.004 <sup>efg</sup>  | 0.158 ± 0.005 <sup>cd</sup>  | 0.100 ± 0.005 <sup>f</sup>   |
| 12                                     | 4.1 ± 0.4 <sup>f</sup>     | 10.68 ± 0.28 <sup>ab</sup>   | 0.163 ± 0.013 <sup>cde</sup>          | 0.338 ± 0.011 <sup>abcd</sup> | 0.142 ± 0.028 <sup>d</sup>   | 0.213 ± 0.009 <sup>bc</sup>  |
| 13                                     | 3.29 ± 0.20 <sup>g</sup>   | 11.6 ± 0.5 <sup>a</sup>      | 0.148 ± 0.006 <sup>ef</sup>           | 0.345 ± 0.007 <sup>abc</sup>  | 0.105 ± 0.005 <sup>e</sup>   | 0.219 ± 0.013 <sup>b</sup>   |
| 14                                     | 3.01 ± 0.17 <sup>g</sup>   | 10.6 ± 0.6 <sup>ab</sup>     | 0.137 ± 0.006 <sup>f</sup>            | 0.330 ± 0.013 <sup>bcde</sup> | 0.103 ± 0.007 <sup>e</sup>   | 0.145 ± 0.009 <sup>be</sup>  |
| 15                                     | 4.04 ± 0.22 <sup>f</sup>   | 11.4 ± 0.3 <sup>a</sup>      | 0.161 ± 0.005 <sup>de</sup>           | 0.374 ± 0.007 <sup>a</sup>    | 0.144 ± 0.011 <sup>d</sup>   | 0.258 ± 0.013 <sup>a</sup>   |
| 16                                     | 3.255 ± 0.028 <sup>g</sup> | 8.6 ± 0.9 <sup>cde</sup>     | 0.171 ± 0.006 <sup>cd</sup>           | 0.278 ± 0.019 <sup>fg</sup>   | 0.106 ± 0.006 <sup>e</sup>   | 0.19 ± 0.03 <sup>bc</sup>    |
| <b>Conventional extraction (70 °C)</b> |                            |                              |                                       |                               |                              |                              |
| 17 <sup>1</sup>                        | 4.24 ± 0.09 <sup>f</sup>   | 11.2 ± 0.4 <sup>ab</sup>     | 0.225 ± 0.006 <sup>b</sup>            | 0.274 ± 0.018 <sup>fg</sup>   | 0.158 ± 0.006 <sup>cd</sup>  | 0.294 ± 0.018 <sup>a</sup>   |
| 18 <sup>2</sup>                        | 9.50 ± 0.19 <sup>a</sup>   | 5.34 ± 0.14 <sup>g</sup>     | 0.351 ± 0.004 <sup>a</sup>            | 0.096 ± 0.005 <sup>j</sup>    | 0.300 ± 0.005 <sup>a</sup>   | 0.1396 ± 0.0023 <sup>e</sup> |
| 19 <sup>3</sup>                        | 0.70 ± 0.18 <sup>i</sup>   | 0.86 ± 0.15 <sup>h</sup>     | 0.036 ± 0.009 <sup>i</sup>            | 0.020 ± 0.004 <sup>k</sup>    | 0.017 ± 0.004 <sup>g</sup>   | 0.015 ± 0.003 <sup>h</sup>   |

Mean values with different letters (a, b, c, etc.) within the same column are statistically different (p &lt; 0.05)

<sup>1</sup>2 h in EtOH; <sup>2</sup>24 h in EtOH; <sup>3</sup>2 h in H<sub>2</sub>O

Exp. Number corresponds to the main article

**Figure S1.** General structures of investigated ionic liquids.

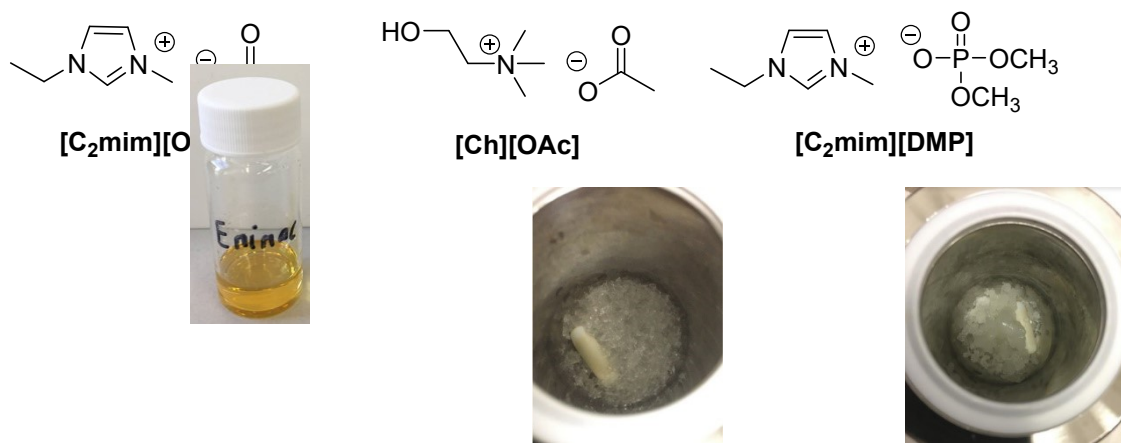

**Figure S2.** Extracts of different IL-SFE. Left: Extract with [C<sub>2</sub>min][OAc]; Middle: Extract with [Ch][OAc]; Right: Extract with [C<sub>2</sub>min][DMP].

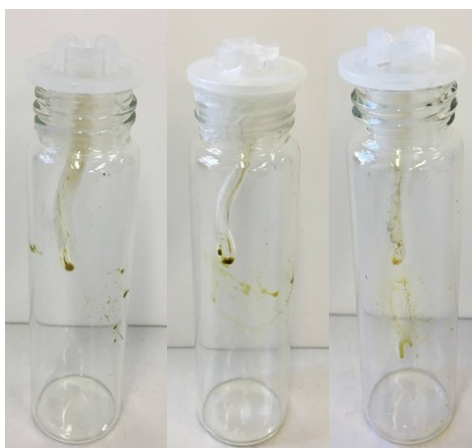

**Figure S3.** Residues after extraction of different IL-SFE. Left: Extract with [C<sub>2</sub>min][OAc]; Middle: Extract with [C<sub>2</sub>min][DMP].

Extract with [Ch][OAc]; Right:

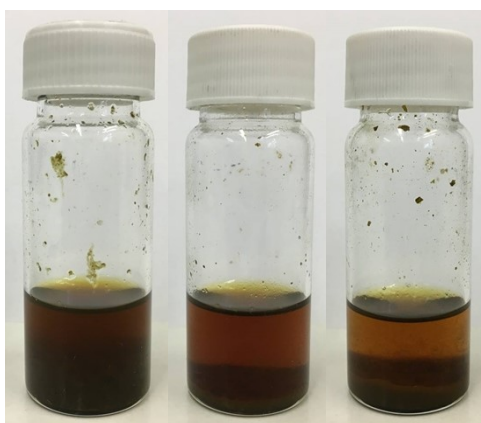

**Figure S4.** ILS after purification. Left: Extract with [C<sub>2</sub>min][OAc]; Middle: Extract with [Ch][OAc]; Right: Extract with [C<sub>2</sub>min][DMP].

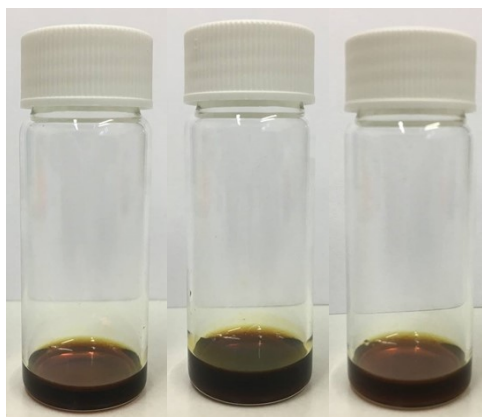

**Table S3.** Cannabinoid yields of supercritical CO<sub>2</sub> extraction with EtOH as a modifier and conventional ethanolic extraction of another batch of industrial hemp, (n = 3 ± SD). SFE was performed at various temperatures, pressures and vol% EtOH. Total flow: 1 mL/min; Static extraction 30 min; Dynamic extraction 120 min. Conventional extraction was performed at various temperatures and a hemp:EtOH ratio of 1:10.

| No.                            | EtOH/<br>vol% | T <sub>Pre</sub> /<br>°C | Σ(CBD)/<br>(mg/g)         | Σ(THC)/<br>(mg/g)              | Σ(CBG)/<br>(mg/g)            |
|--------------------------------|---------------|--------------------------|---------------------------|--------------------------------|------------------------------|
| <b>SFE</b>                     |               |                          |                           |                                |                              |
| 1                              | 1             | 35                       | 4.1 ± 0.4 <sup>c</sup>    | 0.086 ± 0.010 <sup>b</sup>     | 0.045 ± 0.006 <sup>c</sup>   |
| 2                              | 10            | 35                       | 9.48 ± 0.18 <sup>b</sup>  | 0.222 ± 0.012 <sup>a</sup>     | 0.177 ± 0.003 <sup>b</sup>   |
| 3                              | 20            | 35                       | 9.55 ± 0.20 <sup>b</sup>  | 0.243 ± 0.022 <sup>a</sup>     | 0.178 ± 0.005 <sup>b</sup>   |
| 4                              | 20            | 80                       | 0.36 ± 0.10 <sup>d</sup>  | 0.00492 ± 0.00021 <sup>c</sup> | n.d.                         |
| <b>Conventional extraction</b> |               |                          |                           |                                |                              |
| 5                              | -             | 35                       | 10.29 ± 0.07 <sup>a</sup> | 0.233 ± 0.006 <sup>a</sup>     | 0.2173 ± 0.0017 <sup>a</sup> |
| 6                              | -             | 60                       | 10.9 ± 0.4 <sup>a</sup>   | 0.249 ± 0.015 <sup>a</sup>     | 0.229 ± 0.010 <sup>a</sup>   |
| 7                              | -             | 80                       | 10.9 ± 0.3 <sup>a</sup>   | 0.250 ± 0.012 <sup>a</sup>     | 0.231 ± 0.009 <sup>a</sup>   |

Mean values with different letters (a, b, c, etc.) within the same column are statistically different ( $p < 0.05$ )  
n.d.: not detected

**Table S4.** NMR spectroscopic data of purified [C<sub>2</sub>min][OAc], [Ch][OAc] and [C<sub>2</sub>min][DMP] recorded in chloroform-*d*<sub>4</sub>. All <sup>1</sup>H-NMR chemical shifts [ppm] are listed together with relative integral, multiplicity as well as coupling constants [Hz].

| IL                        | δH (J in Hz)                                                                                                      |
|---------------------------|-------------------------------------------------------------------------------------------------------------------|
| [C <sub>2</sub> min][OAc] | 11.59 (s), 7.19 (d, 2.0, 1H), 7.17 (d, 2.0, 1H), 4.33 (q, 7.4, 2H), 4.02 (s, 3H), 1.96 (s, 3H), 1.52 (t, 7.4, 3H) |
| [Ch][OAc] <sup>b</sup>    | 4.13 (m, 2H), 3.75 (m, 2H), 3.37 (s, 9H), 1.94 (s, 3H)                                                            |
| [C <sub>2</sub> min][DMP] | 10.70 (s, 1H), 7.31 (m, 1H), 7.28 (1H, m), 4.33 (q, 7.4, 2H), 4.03 (s, 3H), 3.57 (d, 10.5, 6H), 1.53 (t, 7.4, 3H) |

**Figure S5.**  $^1\text{H-NMR}$  of purified  $[\text{C}_2\text{min}][\text{OAc}]$  in chloroform- $d_4$ .

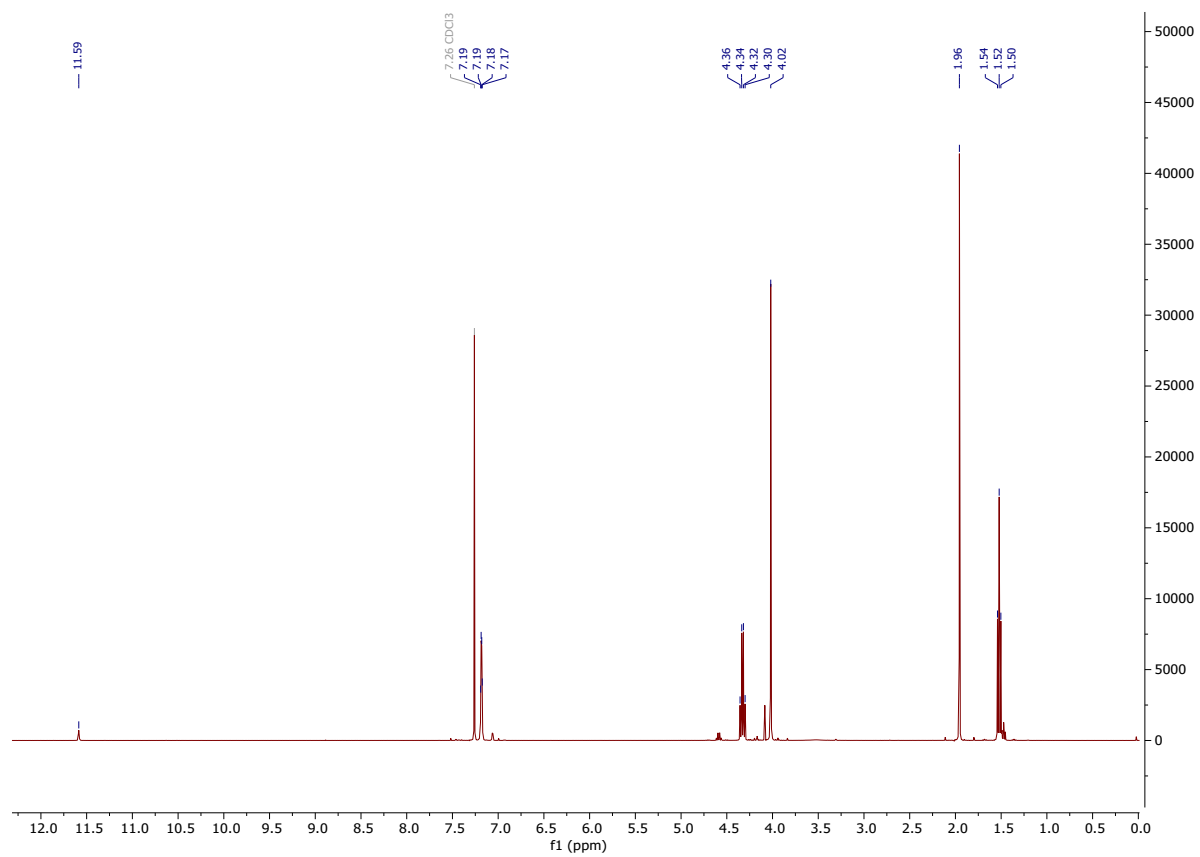

**Figure S6.**  $^1\text{H-NMR}$  of purified  $[\text{Ch}][\text{OAc}]$  in chloroform- $d_4$ .

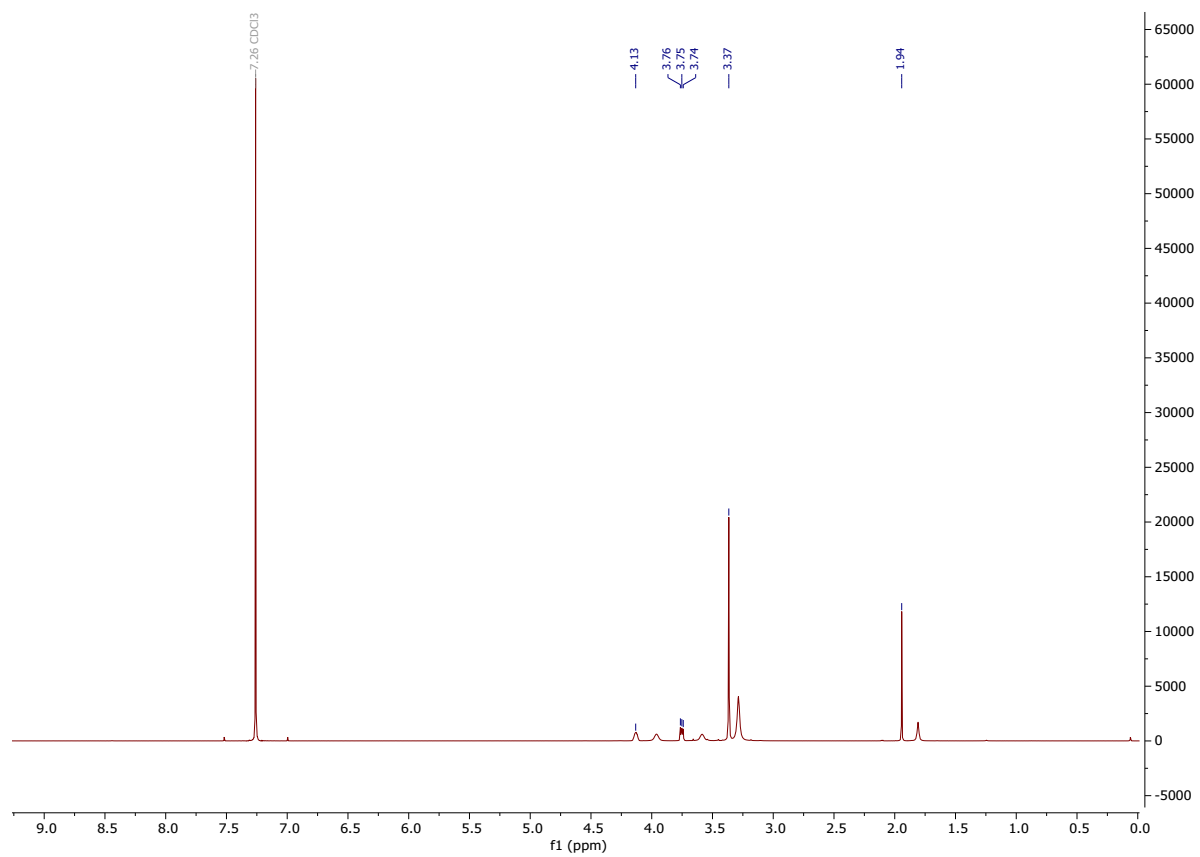

Figure S7.  $^1\text{H-NMR}$  of purified  $[\text{C}_2\text{min}][\text{DMP}]$  in chloroform- $d_4$ .

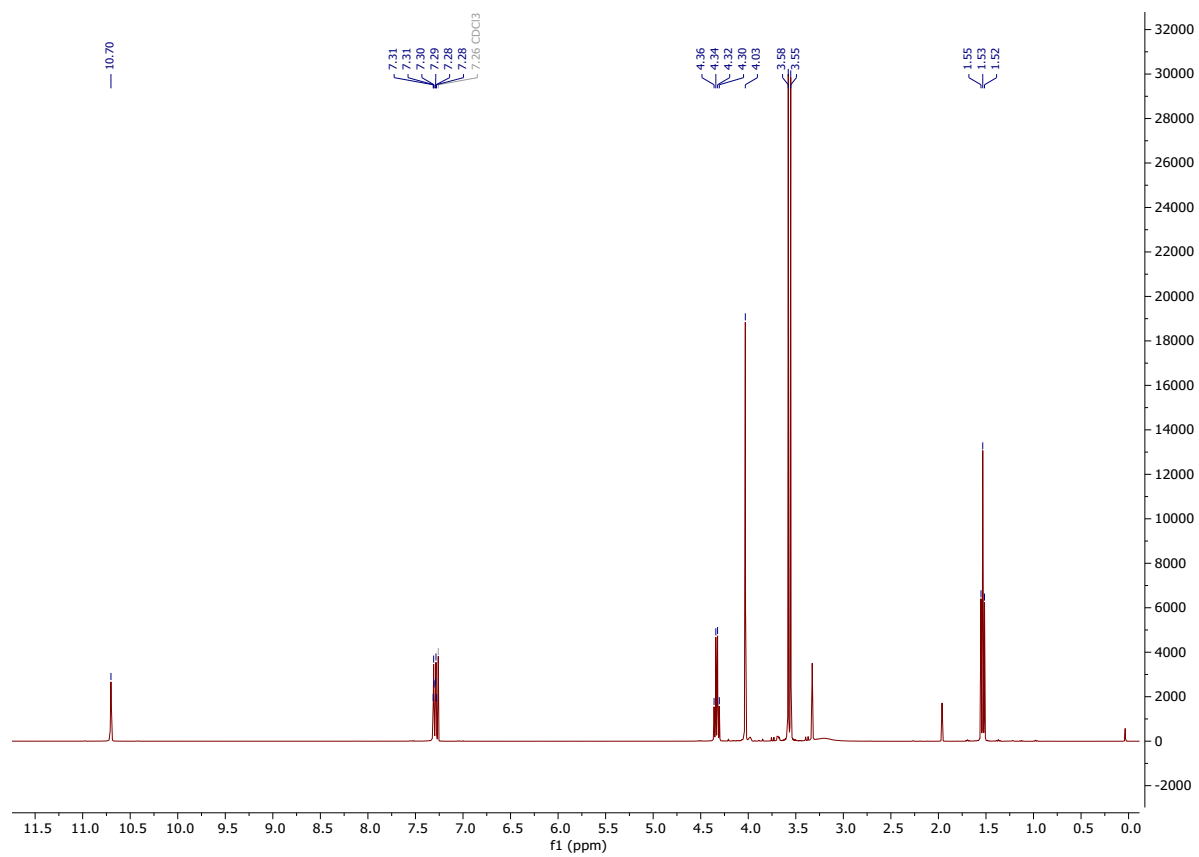

Supplement: d1gc03516a1.pdf [file d1gc03516a1.pdf]
